# Supplementary material for: Effector T Cells Promote Fibrosis in Corneal Transplantation Failure
Source: PubMed Central journal article supplement — Invest Ophthalmol Vis Sci. 2024 Jan 23;65(1):40. doi: 10.1167/iovs.65.1.40 (PMC10810018; doi:10.1167/iovs.65.1.40), 2024-01-23
Supplement: iovs-65-1-40_s001.pdf [file iovs-65-1-40_s001.pdf]

## Supplemental Figure 1.

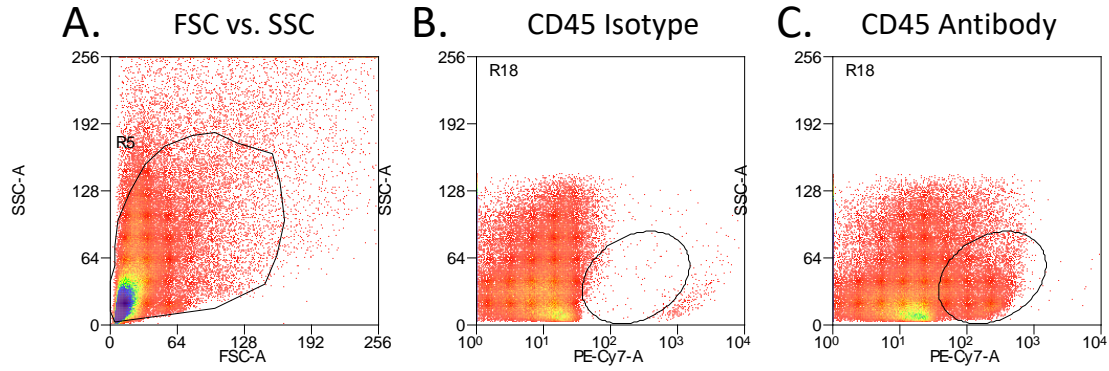

**Supplemental Figure 1:** Flow cytometry gating strategy. (A) Digested cornea flow cytometry samples were first analyzed by performing forward scatter versus side scatter analysis to exclude dead cells. (B,C) anti-CD45 antibody and isotype control were used identify CD45+ hematopoietic cells.
