# Supplementary material for: Effector T Cells Promote Fibrosis in Corneal Transplantation Failure
Source: PubMed Central journal article supplement — Invest Ophthalmol Vis Sci. 2024 Jan 23;65(1):40. doi: 10.1167/iovs.65.1.40 (PMC10810018; doi:10.1167/iovs.65.1.40), 2024-01-23
Supplement: iovs-65-1-40_s002.pdf [file iovs-65-1-40_s002.pdf]

**Supplemental Table 1: Graft Opacity Scoring**

| <b>Score</b> | <b>Clinical Manifestations</b>                                |
|--------------|---------------------------------------------------------------|
| 0            | Clear                                                         |
| 1            | Minimal superficial opacity, iris vessels readily visible     |
| 2            | Minimal stromal opacity, iris vessels still visible           |
| 3            | Moderate stromal opacity, only pupil margin visible           |
| 4            | Intense stromal opacity, only portion of pupil margin visible |
| 5            | Maximal stromal opacity, anterior chamber not visible         |
